# Supplementary material for: Review of rolling contact fatigue life calculation for oscillating bearings and recommendations for use, with examples for wind turbine bearings
Source: Copernicus journal article supplement (doi:10.5194/wes-2023-102), 2023-09-19
Supplement: Supplementary file [file wes-2023-102-AC3-supplement.pdf]

Thank you for your review. Answers and comments are found below in blue.

#### General Comments

In this paper, the authors summarize the literature pertaining to rolling contact fatigue life fatigue for oscillating bearings – including many clarifications and filling of gaps. The similarities and differences and pros and cons for the various methods are highlighted, concluding in an interesting and helpful flow chart that recommends the best method(s) depending on the application conditions. This is followed by several different examples that describe the basic parameters of each application from the resulting method. This reviewer's experience is that the variety of these methods is quite confusing, so having a succinct review of them with a few examples is helpful. The title is certainly sufficient, but I might also suggest "Review of rolling contact fatigue life calculation for oscillating bearings and application-dependent recommendations for use". It's a bit more general, as there are 2 non-wind examples, and 2 wind examples.

Thank you for the suggestion, we have changed the title accordingly.

#### Specific Technical Comments

None

#### Minor Clarifying Comments

Line 12: I would add "Their movements..." to indicate to the reader that the sentence is describing pitch movements, as the same language is used in the next sentence to describe yaw movements.

Changed as suggested.

Line 25: I would write "An overview...is given in Section 2."

Changed as suggested.

Line 168: I believe this is an "s" missing in "...either Harris's..."

Added an s.
